# Supplementary material for: The Safety of Metoclopramide Use in the First Trimester of Pregnancy
Source: Atypon-hosted journal article supplement (doi:10.1056/nejmoa0807154), 2009-06-10
Supplement: nejm_matok_2528sa1.pdf [file nejm_matok_2528sa1.pdf]

## Supplementary Appendix

This appendix has been provided by the authors to give readers additional information about their work.

Supplement to: Matok I, Gorodischer R, Koren G, Sheiner E, Wiznitzer A, Levy A. The safety of metoclopramide use in the first trimester of pregnancy. *N Engl J Med* 2009;360:2528-35.

Web Table 1: Rates and the Risk of Subclasses of Major Congenital Malformations in Infants of Intrauterine Exposed Compared to Unexposed to Metoclopramide During the First Trimester\*.

| Subclasses of Major Congenital Malformations (ICD-9 Code)             | Exposure to Metoclopramide |                  | Crude Odds Ratio (95% Confidence Interval) | Adjusted Odds Ratio** (95% Confidence Interval) |
|-----------------------------------------------------------------------|----------------------------|------------------|--------------------------------------------|-------------------------------------------------|
|                                                                       | Yes (%) (n=182)            | No (%) (n=3,834) |                                            |                                                 |
| Anencephaly (740)                                                     | 3 (0.10)                   | 8 (0.01)         | ***                                        | ***                                             |
| Spina bifida (741)                                                    | 2 (0.1)                    | 46 (0.1)         | ***                                        | ***                                             |
| Other anomaly of the nervous system (742)                             | 24 (0.7)                   | 439 (0.6)        | 1.24<br>(0.82 – 1.87)                      | 1.15<br>(0.76 – 1.74)                           |
| Anomalies of the eye (743)                                            | 5 (0.1)                    | 72 (0.1)         | 1.57<br>(0.64 – 3.89)                      | 1.44<br>(0.58 – 3.58)                           |
| Anomalies of the ear, face, and neck (744)                            | 0 (0.0)                    | 5 (0.01)         | ***                                        | ***                                             |
| Bulbus cordis anomalies and anomalies of cardiac septal closure (745) | 47 (1.4)                   | 909 (1.2)        | 1.17<br>(0.87 – 1.58)                      | 1.13<br>(0.84 – 1.52)                           |
| Other anomalies of the heart (746)                                    | 19 (0.5)                   | 530 (0.7)        | 0.81<br>(0.51 – 1.28)                      | 0.77<br>(0.49 – 1.23)                           |
| Other anomalies of the circulatory system (747)                       | 12 (0.3)                   | 213 (0.3)        | 1.28<br>(0.71 – 2.28)                      | 1.21<br>(0.68 – 2.18)                           |
| Anomalies of the respiratory system (748)                             | 13 (0.4)                   | 223 (0.3)        | 1.32<br>(0.75 – 2.31)                      | 1.26<br>(0.72 – 2.20)                           |
| Cleft palate and lip (749)                                            | 4 (0.1)                    | 104 (0.1)        | ***                                        | ***                                             |
| Other anomalies of the upper alimentary tract (750)                   | 3 (0.1)                    | 94 (0.1)         | ***                                        | ***                                             |
| Other anomalies of the digestive system (751)                         | 8 (0.2)                    | 214 (0.3)        | 0.85<br>(0.42 – 1.71)                      | 0.81<br>(0.40 – 1.64)                           |
| Genital anomalies (752)                                               | 12 (0.3)                   | 321 (0.4)        | 0.85<br>(0.48 -1.51)                       | 0.83<br>(0.47 – 1.48)                           |
| Anomalies of the urinary system (753)                                 | 10 (0.3)                   | 272 (0.3)        | 0.83<br>(0.44 – 1.56)                      | 0.79<br>(0.42 – 1.49)                           |
| Musculoskeletal deformities (754)                                     | 35 (1.0)                   | 604 (0.8)        | 1.31<br>(0.93 – 1.85)                      | 1.26<br>(0.89 – 1.78)                           |
| Other anomalies of the limbs (755)                                    | 4 (0.1)                    | 107 (0.1)        | ***                                        | ***                                             |
| Other musculoskeletal anomalies (756)                                 | 17 (0.5)                   | 468 (0.6)        | 0.82<br>(0.51 – 1.33)                      | 0.79<br>(0.49 – 1.29)                           |
| Anomaly of the integument (757)                                       | 0 (0.0)                    | 6 (0.01)         | ***                                        | ***                                             |

\* The number of total malformation is not equal to the total number of infants with malformations since there are infants born with more than one congenital malformation.

\*\*The models were controlled for maternal age, ethnicity, maternal diabetes, maternal smoking and parity.

\*\*\* To minimize statistical instability, we did not estimate risks if fewer than five infants were exposed to metoclopramide.
